# Supplementary material for: Commercial Bio-Packaging to Preserve the Quality and Extend the Shelf-Life of Vegetables: The Case-Study of Pumpkin Samples Studied by a Multimethodological Approach
Source: MDPI journal article supplement (doi:10.3390/foods10102440), 2021-10-14
Supplement: s1 [file s1]

# Commercial bio-packaging to preserve the quality and extend the shelf-life of vegetables: the case-study of pumpkin samples studied by a multimethodological approach

**Giacomo Di Matteo <sup>1 †</sup>, Paola Di Matteo <sup>2 †</sup>, Matteo Sambucci <sup>2</sup>, Jacopo Tirillò <sup>2</sup>, Anna Maria Giusti <sup>3</sup>, Giuliana Vinci <sup>4</sup>, Laura Gobbi <sup>4</sup>, Sabrina Antonia Prencipe <sup>4</sup>, Andrea Salvo <sup>1</sup>, Cinzia Ingallina <sup>1</sup>, Mattia Spano <sup>1</sup>, Anatoly P. Sobolev <sup>5</sup>, Noemi Proietti <sup>5</sup>, Valeria Di Tullio <sup>5</sup>, Paola Russo <sup>2\*</sup>, Luisa Mannina <sup>1\*</sup> Marco Valente <sup>2</sup>**

<sup>1</sup> Dipartimento di Chimica e Tecnologie del Farmaco, Laboratorio di Chimica degli Alimenti, Sapienza Università di Roma, Piazzale Aldo Moro 5, 00182 Roma, Italy

<sup>2</sup> Dipartimento di Ingegneria Chimica Materiali Ambiente, Sapienza Università di Roma, Via Eudossiana 18, 00184, Roma, Italy

<sup>3</sup> Dipartimento di Medicina Sperimentale, Sapienza Università di Roma, Viale Regina Elena, 324, 00161, Roma, Italy

<sup>4</sup> Dipartimento di Management, Sapienza Università di Roma, Via del Castro Laurenziano 9, 00161, Roma, Italy <sup>#</sup> Board member of Italian Society of Food Chemistry

<sup>5</sup> Laboratorio di Risonanza Magnetica “Segre-Capitani”, Istituto per i Sistemi Biologici, Area della Ricerca di Roma 1, CNR, via Salaria Km 29,300 00015 Monterotondo (Rm) Italy

<sup>†</sup> These authors gave an equal contribution to this work

<sup>\*</sup> Correspondence: paola.russo@uniroma1.it; phone.: +39-06-44585565 (P.R.); luisa.mannina@uniroma1.it; phone.: +39-06-49913735 (L.M.)

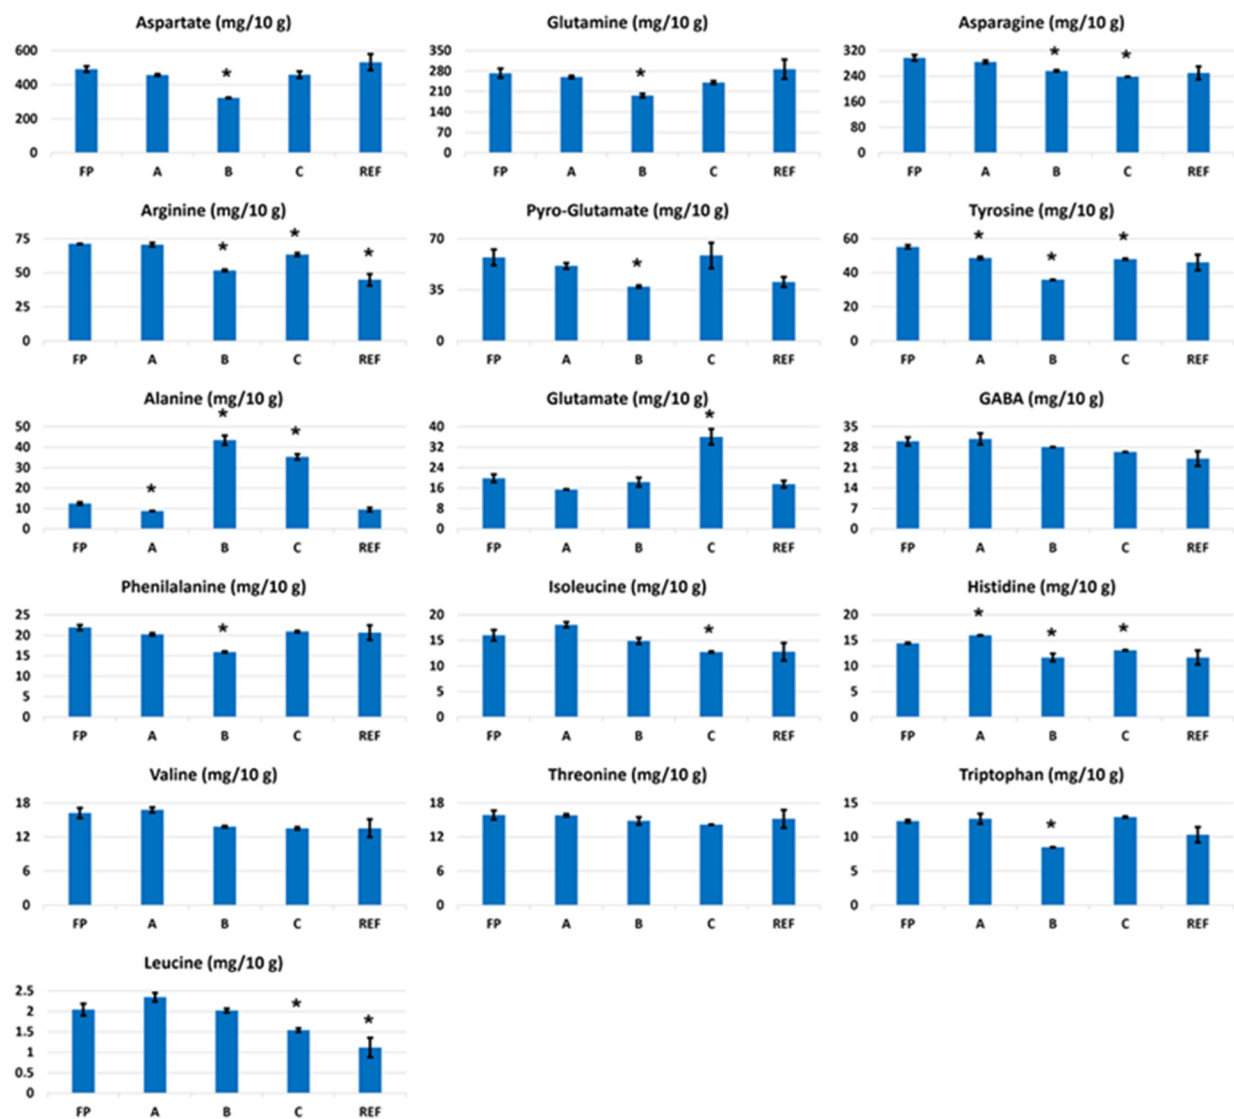

**Figure S1.** Bar charts of the amino acids identified and quantified (mg/10 g of DW  $\pm$  SD) in the  $^1\text{H}$  NMR spectra of hydroalcoholic extracts of freeze dried pumpkins samples. FP=Fresh Pumpkin sample (time 0); A, B and C= commercial bio-films; REF= polyethylene film

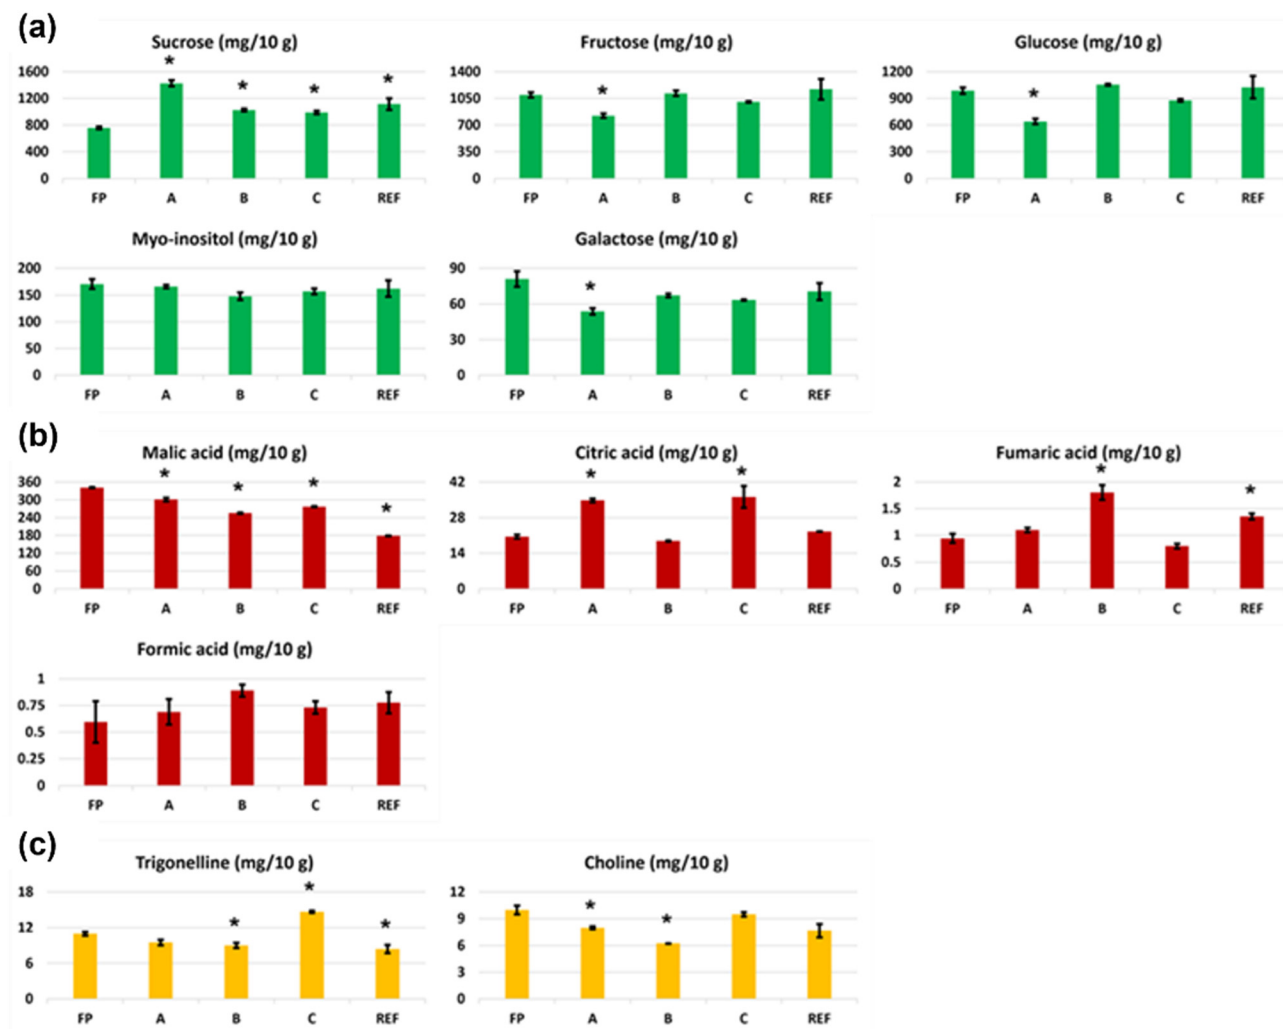

**Figure S2.** Bar charts of the sugars (a), organic acids (b) and other metabolites (c) identified and quantified (mg/10 g of DW  $\pm$  SD) in the  $^1\text{H}$  NMR spectra of hydroalcoholic extracts of pumpkins. FP=Fresh Pumpkin sample (time 0); A, B and C= commercial bio-films; REF= polyethylene film

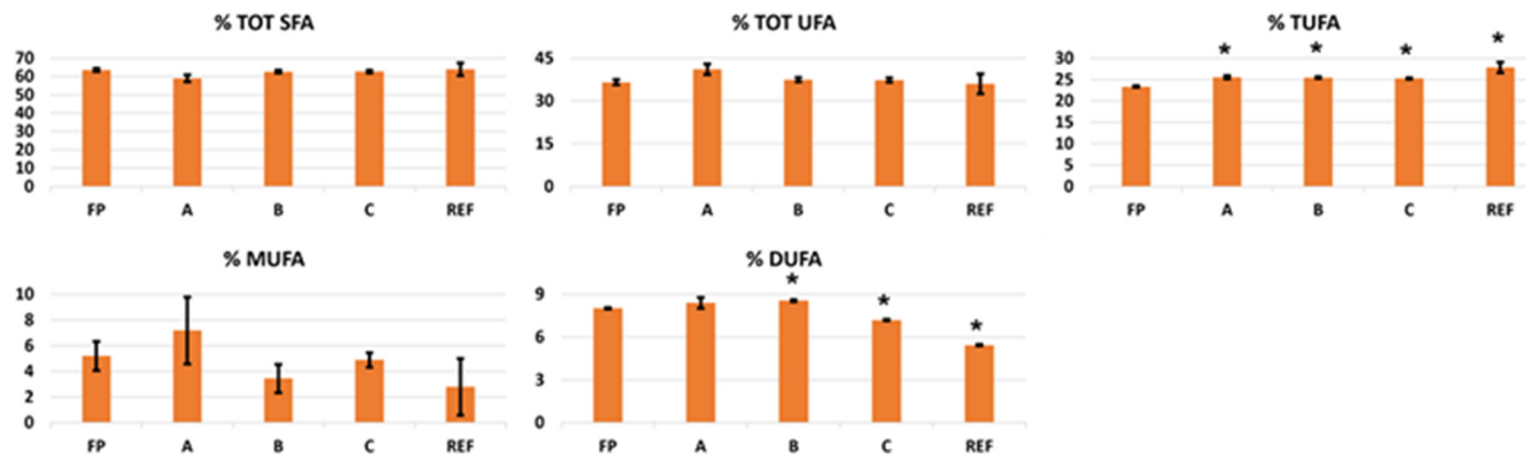

**Figure S3.** Bar charts of the fatty acids identified and quantified (molar %  $\pm$  SD) in the  $^1\text{H}$  NMR spectra of organic extracts of pumpkins. FP=Fresh Pumpkin sample (time 0); A, B and C= commercial biofilms; REF= polyethylene film

**Table S1.** Metabolites identified in the 600.13 MHz  $^1\text{H}$  NMR,  $^1\text{H}$ -  $^1\text{H}$  TOCSY,  $^1\text{H}$ - $^{13}\text{C}$  HSQC, and  $^1\text{H}$ - $^{13}\text{C}$  HMBC spectra of Bligh–Dyer hydroalcoholic extracts of pumpkins in phosphate buffer/D $_2$ O acquired at 28 °C. Asterisks (\*) indicate signals selected for integration.

| Compound                   | Assignment | $^1\text{H}$ (ppm) | Multiplicity [J(Hz)] | $^{13}\text{C}$ (ppm) |
|----------------------------|------------|--------------------|----------------------|-----------------------|
| <b>Carbohydrates</b>       |            |                    |                      |                       |
| $\alpha$ -D-Fructofuranose | CH-3       | 4.12*              |                      | 83.0                  |
|                            | CH-5       | 4.07               |                      | 82.4                  |
| $\beta$ -D-Fructofuranose  | CH-1,1'    | 3.60; 3.57         |                      | 63.8                  |
|                            | CH-3       | 4.12*              |                      | 76.4                  |
|                            | CH-4       | 4.12*              |                      | 75.4                  |
|                            | CH-5       | 3.83               |                      | 81.6                  |
|                            | CH-6,6'    | 3.81; 3.68         |                      | 63.3                  |
| $\beta$ -D-Fructopyranose  | CH-1,1'    | 3.72; 3.56         |                      | 64.8                  |
|                            | CH-3       | 3.81               |                      | 68.5                  |
|                            | CH-4       | 3.90               |                      | 70.6                  |

|                     |                       |            |         |      |
|---------------------|-----------------------|------------|---------|------|
|                     | CH-5                  | 4.01       |         | 70.2 |
|                     | CH <sub>2</sub> -6,6' | 3.71; 4.03 |         | 64.4 |
| $\alpha$ -Galactose | CH-1                  | 5.28*      | d [3.8] | 93.3 |
|                     | CH-2                  | 3.81       |         | 69.3 |
|                     | CH-3                  | 3.86       |         | 70.2 |
|                     | CH-4                  | 4.00       |         | 70.2 |
|                     | CH-5                  | 4.09       |         | 71.5 |
|                     |                       |            |         |      |
| $\beta$ -Galactose  | CH-1                  | 4.60*      | d [7.9] | 97.5 |
|                     | CH-2                  | 3.50       |         | 72.9 |
|                     | CH-3                  | 3.66       |         | 73.7 |
|                     | CH-4                  | 3.94       |         | 69.7 |
|                     | CH-5                  | 3.71       |         | 76.1 |
|                     | CH <sub>2</sub> -6    | 3.74       |         | 62.2 |
| $\alpha$ -Glucose   | CH-1                  | 5.25*      | d [3.8] | 93.1 |
|                     | CH-2                  | 3.55       |         | 72.2 |
|                     | CH-3                  | 3.72       |         | 73.7 |
|                     | CH-4                  | 3.42       |         | 70.6 |
|                     | CH-5                  | 3.83       |         | 72.5 |
|                     | CH <sub>2</sub> -6,6' | 3.83; 3.78 |         | 61.6 |
| $\beta$ -Glucose    | CH-1                  | 4.66*      | d [8.0] | 97.0 |
|                     | CH-2                  | 3.26       |         | 75.2 |
|                     | CH-3                  | 3.50       |         | 76.8 |
|                     | CH-4                  | 3.41       |         | 70.6 |
|                     | CH-5                  | 3.47       |         | 76.9 |
|                     | CH <sub>2</sub> -6,6' | 3.90; 3.74 |         | 61.8 |
| Myo-Inositol        | CH-1                  | 4.07       |         | 73.2 |
|                     | CH-2,5                | 3.55       |         | 72.4 |
|                     | CH-3,6                | 3.63       |         | 73.5 |
|                     | CH-4                  | 3.29*      | t [9.4] | 75.4 |

|                      |                                   |             |                                |       |
|----------------------|-----------------------------------|-------------|--------------------------------|-------|
| Sucrose              | CH-1 (Glucose)                    | 5.42*       | d [3.8]                        | 93.2  |
|                      | CH-2                              | 3.57        |                                | 72.1  |
|                      | CH-3                              | 3.77        |                                | 73.5  |
|                      | CH-4                              | 3.48        |                                | 70.2  |
|                      | CH-5                              | 3.85        |                                | 73.5  |
|                      | CH <sub>2</sub> -6                | 3.82        |                                | 61.1  |
|                      | CH-1' (Fructose)                  | 3.69        |                                | 62.4  |
|                      | CH-3'                             | 4.22        | d [8.8]                        | 77.5  |
|                      | CH-4'                             | 4.06        |                                | 75.1  |
|                      | CH-5'                             | 3.90        |                                | 82.4  |
|                      | CH <sub>2</sub> -6'               | 3.82        |                                | 63.4  |
| <b>Organic acids</b> |                                   |             |                                |       |
| Citric acid          | $\alpha,\gamma$ -CH               | 2.54*       | d [15.5]                       | 46.4  |
|                      | $\alpha',\gamma'$ -CH             | 2.68        |                                | 46.4  |
|                      | $\beta$ -C                        |             |                                | 76.4  |
| Formic acid          | HCOOH                             | 8.47*       | s                              |       |
| Fumaric Acid         | $\alpha,\beta$ -CH=CH             | 6.53*       | s                              |       |
| Malic acid           | $\alpha$ -CH                      | 4.30*       | dd [9.9; 3.2]                  | 71.3  |
|                      | $\beta,\beta'$ -CH <sub>2</sub>   | 2.39; 2.70  | dd [15.3; 9.9]; dd [15.3; 3.2] | 43.6  |
|                      | C                                 |             |                                | 182.6 |
| <b>Amino acids</b>   |                                   |             |                                |       |
| Alanine              | $\alpha$ -CH                      | 3.79        |                                | 51.5  |
|                      | $\beta$ -CH <sub>3</sub>          | 1.49*       | d [7.3]                        | 17.2  |
|                      | COOH                              |             |                                | 177.0 |
| Arginine             | $\alpha$ -CH                      | 3.78        |                                | 55.1  |
|                      | $\beta$ -CH <sub>2</sub>          | 1.93        | m                              | 28.6  |
|                      | $\gamma,\gamma'$ -CH <sub>2</sub> | 1.66; 1.73* | m                              | 24.9  |

|                         |                                   |             |                               |       |
|-------------------------|-----------------------------------|-------------|-------------------------------|-------|
|                         | $\delta$ -CH <sub>2</sub>         | 3.24        |                               | 41.4  |
| Asparagine              | $\alpha$ -CH                      | 4.01        |                               | 52.2  |
|                         | $\beta,\beta'$ -CH <sub>2</sub>   | 2.88*; 2.96 | dd [7.2; 16.9]; dd[4.5; 16.9] | 35.7  |
|                         | COOH                              |             |                               | 175.4 |
|                         |                                   |             |                               |       |
| Aspartate               | $\alpha$ -CH                      | 3.90        |                               | 53.1  |
|                         | $\beta,\beta'$ -CH <sub>2</sub>   | 2.71; 2.81* | dd [8.1; 17.5]; dd[3.8; 17.5] | 37.5  |
|                         | $\gamma$ -COO-                    |             |                               | 178.5 |
|                         | COOH                              |             |                               | 175.3 |
| $\gamma$ -Aminobutyrate | $\alpha$ -CH <sub>2</sub>         | 2.30*       | t [7.4]                       | 35.4  |
|                         | $\beta$ -CH <sub>2</sub>          | 1.91        |                               | 24.7  |
|                         | $\gamma$ -CH <sub>2</sub>         | 3.02        | t [7.7]                       | 40.4  |
|                         |                                   |             |                               | 182.7 |
| Glutamine               | $\alpha$ -CH                      | 3.78        |                               | 55.1  |
|                         | $\beta,\beta'$ -CH <sub>2</sub>   | 2.15        | m                             | 27.4  |
|                         | $\gamma$ -CH                      | 2.46*       | m                             | 31.9  |
|                         | $\gamma$ -CO                      |             |                               | 178.6 |
|                         | COOH                              |             |                               | 175.0 |
|                         |                                   |             |                               |       |
| Glutamate               | $\alpha$ -CH                      | 3.77        |                               | 55.7  |
|                         | $\beta,\beta'$ -CH <sub>2</sub>   | 2.07; 2.12  | m                             | 28.0  |
|                         | $\gamma$ -CH <sub>2</sub>         | 2.35*       | m                             | 34.4  |
|                         | $\delta$ -COOH                    |             |                               | 181.2 |
| Histidine               | CH-2                              | 8.12*       | d [1.0]                       |       |
|                         | CH-4                              | 7.18        |                               | 118.3 |
|                         | $\alpha$ -CH                      | 4.01        |                               | 55.4  |
|                         | $\beta,\beta'$ -CH <sub>2</sub>   | 3.24; 3.30  |                               | 28.2  |
| Isoleucine              | $\alpha$ -CH                      | 3.68        |                               | 60.5  |
|                         | $\beta$ -CH                       | 1.98        |                               | 36.8  |
|                         | $\gamma,\gamma'$ -CH <sub>2</sub> | 1.27; 1.47  |                               | 25.5  |

|                |                                  |            |               |       |
|----------------|----------------------------------|------------|---------------|-------|
| Leucine        | $\gamma$ -CH <sub>3</sub>        | 1.01       | d [7.1]       | 15.7  |
|                | $\delta$ -CH <sub>3</sub>        | 0.94*      | t [7.6]       | 12.1  |
|                | $\alpha$ -CH                     | 3.73       |               | 54.3  |
|                | $\beta$ -CH <sub>2</sub>         | 1.73       |               | 40.8  |
|                | $\gamma$ -CH                     | 1.70       |               | 25.2  |
|                | $\delta$ -CH <sub>3</sub>        | 0.97*      | d [6.1]       | 23.0  |
| Phenylalanine  | $\delta'$ -CH <sub>3</sub>       | 0.96       | d [6.2]       | 22.0  |
|                | $\alpha$ -CH                     | 4.00       |               | 56.9  |
|                | $\beta, \beta'$ -CH <sub>2</sub> | 3.16; 3.27 |               | 37.4  |
|                | CH-2,6                           | 7.34       | dd [8.1; 1.2] | 130.5 |
|                | CH-4                             | 7.39       | tt [7.3; 1.2] | 128.6 |
|                | CH-3,5                           | 7.43*      | t [7.8]       | 130.2 |
| Pyro-Glutamate | C1                               |            |               | 136.2 |
|                | $\alpha$ -CH                     | 4.18*      | dd [5.9; 9.1] | 59.3  |
|                | $\beta, \beta'$ -CH <sub>2</sub> | 2.04; 2.51 | m             | 26.5  |
|                | $\gamma$ -CH <sub>2</sub>        | 2.41       | m             | 30.7  |
|                | CO                               |            |               | 182.8 |
|                | COOH                             |            |               | 181.4 |
| Threonine      | $\alpha$ -CH                     | 3.60       |               | 61.4  |
|                | $\beta$ -CH                      | 4.26       |               | 67.0  |
|                | $\gamma$ -CH <sub>3</sub>        | 1.34*      | d [6.6]       | 20.5  |
| Tryptophan     | $\alpha$ -CH                     | 4.07       |               | 55.9  |
|                | $\beta, \beta'$ -CH <sub>2</sub> | 3.33; 3.48 |               | 27.4  |
|                | CH-4                             | 7.28       | t [7.6]       | 123.1 |
|                | CH-5                             | 7.20       | m             | 120.4 |
|                | CH-6                             | 7.74       | d [8.0]       | 119.5 |
|                | CH-7                             | 7.55*      | d [8.1]       | 113.0 |
| Tyrosine       | $\alpha$ -CH                     | 3.95       |               | 57.1  |
|                | $\beta, \beta'$ -CH <sub>2</sub> | 3.07; 3.19 |               | 36.5  |



|                                  |                                               |       |         |       |
|----------------------------------|-----------------------------------------------|-------|---------|-------|
|                                  | CH-2,6                                        | 7.20  | d [8.5] | 131.7 |
|                                  | CH-3,5                                        | 6.91* | d [8.5] | 116.9 |
| Valine                           | $\alpha$ -CH                                  | 3.62  |         | 61.3  |
|                                  | $\beta$ -CH                                   | 2.28  |         | 30.2  |
|                                  | $\gamma$ -CH <sub>3</sub>                     | 1.00  | d [7.0] | 17.7  |
|                                  | $\gamma'$ -CH <sub>3</sub>                    | 1.05* | d [7.0] | 19.0  |
| <b>Miscellaneous metabolites</b> |                                               |       |         |       |
| Choline                          | N(CH <sub>3</sub> ) <sub>3</sub> <sup>+</sup> | 3.21* | s       | 54.9  |
|                                  | $\alpha$ -CH <sub>2</sub>                     | 3.52  |         | 68.4  |
|                                  | $\beta$ -CH <sub>2</sub> -OH                  | 4.06  |         | 56.6  |
| Trigonelline                     | CH <sub>3</sub>                               | 4.45  | s       | 49.2  |
|                                  | CH-1                                          | 9.12  | s       |       |
|                                  | CH-3,5                                        | 8.84* | d [7.0] |       |
|                                  | CH-4                                          | 8.10  | t [7.0] | 128.7 |

**Table S2.** Metabolites identified in the 600.13 MHz <sup>1</sup>H NMR, <sup>1</sup>H- <sup>1</sup>H TOCSY, <sup>1</sup>H-<sup>13</sup>C HSQC, and <sup>1</sup>H-<sup>13</sup>C HMBC spectra of Bligh–Dyer organic extracts of pumpkins CDCl<sub>3</sub>/CD<sub>3</sub>OD (2:1 v/v) mixture acquired at 28 °C. Asterisks (\*) indicate signals selected for integration. For the integration of total fatty acids (I<sub>FA</sub>) and total unsaturated fatty acids (I<sub>UFA</sub>), the region of 2.20–2.36 ppm and 5.25–5.40 ppm, respectively, were considered.

| Compound                                 | Assignment <sup>a</sup> | <sup>1</sup> H (ppm) | Multiplicity: <i>J</i> [Hz] | <sup>13</sup> C (ppm) |
|------------------------------------------|-------------------------|----------------------|-----------------------------|-----------------------|
| Oleic fatty chain<br>(C18:1 $\Delta^9$ ) | COO                     |                      |                             | 174.1                 |
|                                          | CH <sub>2</sub> -2      | 2.30                 |                             | 34.2                  |
|                                          | CH <sub>2</sub> -3      | 1.57                 | m                           | 24.9                  |
|                                          | CH <sub>2</sub> -4,7    | 1.30                 | m                           | 29.6                  |
|                                          | CH <sub>2</sub> -8      | 2.02                 | m                           | 27.3                  |
|                                          | CH=CH 9,10              | 5.32                 | m                           | 130.5                 |
|                                          | CH <sub>2</sub> -11     | 2.02                 | m                           | 27.3                  |
|                                          | CH <sub>2</sub> -12,16  | 1.32                 | m                           | 29.4                  |
|                                          | CH <sub>2</sub> -17     | 1.23                 | m                           | 23.0                  |
|                                          | CH <sub>3</sub> -18     | 0.85                 | t                           | 13.9                  |

|                                                      |                      |       |         |       |
|------------------------------------------------------|----------------------|-------|---------|-------|
| Linoleic fatty chain<br>(C18:2 $\Delta^{9,12}$ )     | COO                  |       |         | 174.1 |
|                                                      | CH <sub>2</sub> -2   | 2.30  |         | 34.2  |
|                                                      | CH <sub>2</sub> -3   | 1.57  | m       | 24.9  |
|                                                      | CH <sub>2</sub> -4,7 | 1.30  | m       | 29.6  |
|                                                      | CH <sub>2</sub> -8   | 2.02  | m       | 27.3  |
|                                                      | CH= 9                | 5.32  | m       | 130.2 |
|                                                      | CH= 10               | 5.31  | m       | 128.3 |
|                                                      | CH <sub>2</sub> -11  | 2.73* | t [6.8] | 25.6  |
|                                                      | CH= 12               | 5.31  | m       | 128.3 |
|                                                      | CH= 13               | 5.32  | m       | 130.2 |
|                                                      | CH <sub>2</sub> -14  | 2.02  | m       | 27.3  |
|                                                      | CH <sub>2</sub> -15  | 1.30  | m       | 29.6  |
|                                                      | CH <sub>2</sub> -16  | 1.30  | m       | 30.4  |
|                                                      | CH <sub>2</sub> -17  | 1.23  | m       | 23.0  |
|                                                      | CH <sub>3</sub> -18  | 0.84  | t [7.1] | 13.9  |
| Linolenic fatty chain<br>(C18:3 $\Delta^{9,12,15}$ ) | COO                  |       |         | 174.1 |
|                                                      | CH <sub>2</sub> -2   | 2.30  |         | 34.2  |
|                                                      | CH <sub>2</sub> -3   | 1.57  | m       | 24.9  |
|                                                      | CH <sub>2</sub> -4,7 | 1.30  | m       | 29.6  |
|                                                      | CH <sub>2</sub> -8   | 2.03  | m       | 27.3  |
|                                                      | CH= 9                | 5.32  | m       | 130.2 |
|                                                      | CH= 10               | 5.31  | m       | 128.3 |
|                                                      | CH <sub>2</sub> 11   | 2.77* | t [6.2] | 25.6  |
|                                                      | CH=CH 12,13          | 5.31  | m       | 128.3 |
|                                                      | CH <sub>2</sub> -14  | 2.77* | t [6.2] | 25.6  |
|                                                      | CH= 15               | 5.29  | m       | 127.9 |
|                                                      | CH= 16               | 5.34  | m       | 132.0 |
|                                                      | CH <sub>2</sub> -17  | 2.04  | m       | 20.6  |
|                                                      | CH <sub>3</sub> -18  | 0.94  | t [7.6] | 14.0  |
| Saturated fatty acids                                | COO                  |       |         | 174.1 |
|                                                      | CH <sub>2</sub> -2   | 2.30  |         | 34.2  |
|                                                      | CH <sub>2</sub> -3   | 1.57  | m       | 24.9  |

|                     |      |   |      |
|---------------------|------|---|------|
| CH <sub>2</sub>     | 1.32 | m | 29.4 |
| CH <sub>2</sub> n-1 | 1.23 |   | 23.0 |
| CH <sub>3</sub> n   | 0.85 | t | 13.9 |

**Table S3.** One-way analysis of variance (ANOVA) of the resulted NMR quantification of the polar metabolites. F and p values for the different examined packaging that reach a  $p < 0.05$  respect to the FP were showed.

|              | A      |          | B       |          | C       |          | REF      |          |
|--------------|--------|----------|---------|----------|---------|----------|----------|----------|
|              | F      | <i>p</i> | F       | <i>p</i> | F       | <i>p</i> | F        | <i>p</i> |
| Ile          |        |          |         |          | 19.64   | 0.0473   |          |          |
| Leu          |        |          |         |          | 22.16   | 0.0423   | 22.07    | 0.0424   |
| Val          |        |          |         |          |         |          |          |          |
| Thr          |        |          |         |          |         |          |          |          |
| Ala          | 78.37  | 0.0125   | 336.64  | 0.0030   | 479.57  | 0.0021   |          |          |
| Arg          |        |          | 1163.06 | 0.0009   | 88.27   | 0.0111   | 74.79    | 0.0131   |
| GABA         |        |          |         |          |         |          |          |          |
| Glu          |        |          |         |          | 45.41   | 0.0213   |          |          |
| Gln          |        |          | 39.95   | 0.0241   |         |          |          |          |
| Citric       | 365.04 | 0.0027   |         |          | 25.96   | 0.0364   |          |          |
| Asp          |        |          | 193.96  | 0.0051   |         |          |          |          |
| Asn          |        |          | 37.31   | 0.0258   | 85.93   | 0.0114   |          |          |
| Chl          | 31.03  | 0.0307   | 117.28  | 0.0084   |         |          |          |          |
| Mio-inositol |        |          |         |          |         |          |          |          |
| Fructose     | 76.31  | 0.0129   |         |          |         |          |          |          |
| Pyro-Glu     |        |          | 26.56   | 0.0356   |         |          |          |          |
| Malic        | 84.06  | 0.0117   | 2150.62 | 0.0005   | 2077.50 | 0.0005   | 16878.34 | 0.0001   |
| Sucrose      | 364.12 | 0.0027   | 168.23  | 0.0059   | 91.77   | 0.0107   | 31.32    | 0.0305   |
| Fumaric      |        |          | 55.49   | 0.0175   |         |          | 31.04    | 0.0307   |
| Tyr          | 54.66  | 0.0178   | 682.72  | 0.0015   | 82.71   | 0.0119   |          |          |
| Phe          |        |          | 169.27  | 0.0059   |         |          |          |          |
| Trp          |        |          | 688.64  | 0.0014   |         |          |          |          |
| His          | 278.19 | 0.0036   | 26.80   | 0.0353   | 180.78  | 0.0055   |          |          |
| Formic       |        |          |         |          |         |          |          |          |
| Trigonelline |        |          | 28.22   | 0.0337   | 215.67  | 0.0046   | 24.39    | 0.0386   |

|           |        |        |
|-----------|--------|--------|
| Glucose   | 104.25 | 0.0095 |
| Galactose | 30.37  | 0.0314 |

**Table S4.** One-way analysis of variance (ANOVA) of the resulted NMR quantification of the fatty acids. F and *p* values for the different examined packaging that reach a *p* < 0.05 respect to the FP were showed.

|         | <b>A</b> |                 | <b>B</b> |                 | <b>C</b> |                 | <b>Control</b> |                 |
|---------|----------|-----------------|----------|-----------------|----------|-----------------|----------------|-----------------|
|         | <b>F</b> | <b><i>p</i></b> | <b>F</b> | <b><i>p</i></b> | <b>F</b> | <b><i>p</i></b> | <b>F</b>       | <b><i>p</i></b> |
| DUFA    |          |                 | 81.44    | 0.0121          | 286.23   | 0.0035          | 3187.09        | 0.0003          |
| TUFA    | 57.94    | 0.0168          | 99.81    | 0.0099          | 125.84   | 0.0079          | 25.16          | 0.0376          |
| Tot UFA |          |                 |          |                 |          |                 |                |                 |
| MUFA    |          |                 |          |                 |          |                 |                |                 |
| Tot SFA |          |                 |          |                 |          |                 |                |                 |
